# Supplementary material
Source: PubMed Central journal article supplement (PMC3610794)

**SUPPLEMENTAL FIGURE 1:** A) Hematoxylin and eosin staining of unwounded skin shows the epidermal and dermal morphology of *IL-22*<sup>-/-</sup> skin is similar to WT skin. Bars = 100 μm. Quantification of hair follicle number and hair cycle stage in WT and *IL-22*<sup>-/-</sup> skin at 7 weeks of age. n = 35-50 hair follicles in 6 mice. B) Quantification of hyperproliferative epidermal area in large (8mm) WT and *IL-22*<sup>-/-</sup> wounds. n = 6 wounds for each timepoint (2 wounds from 3 mice for each of 2 independent experiments). n.s. indicates not significant. C) Proliferation of epidermal cells of WT or *IL-22*<sup>-/-</sup> mice is similar 3 days post wounding with 2 mm punch biopsies as indicated by immunostaining of skin sections with antibodies against Ki67. D) Quantification of the number of Ki67<sup>+</sup> cells per field of view in the leading edge of WT and *IL-22*<sup>-/-</sup> wounds. n = 6 wounds from 6 individual mice for each timepoint. E) Quantification of % reepithelialization in WT and *IL-22*<sup>-/-</sup> mice at indicated timepoints after wounding with indicated biopsy size. n = 18 mice (6 wounds from 6 mice for each of 3 independent experiments). Rate was determined using linear regression to calculate the slope of the re-epithelialization for WT and *IL-22*<sup>-/-</sup> wounds. Data are mean +/- SEM.

**SUPPLEMENTAL FIGURE 2:** A) Real time PCR analysis of *CD45* mRNA expression in WT or *IL-22*<sup>-/-</sup> wounds 3 days after wounding. n = 6 mice for each genotype. Skin sections of WT and *IL-22*<sup>-/-</sup> mice 3 days after wounding were immunostained with antibodies against CD45. B) Skin sections of WT and *IL-22*<sup>-/-</sup> mice 3 days after wounding were immunostained with isolectin GS-IB4 to mark blood vessels. C) Skin sections of WT and *IL-22*<sup>-/-</sup> mice 5 days after wounding were immunostained with antibodies against cathelicidin, an antimicrobial peptide induced during wounding. LE indicates leading edge of wound. Bars = 100μm.

**SUPPLEMENTAL FIGURE 3:** A) Representative FACS plots keratinocyte isolation. α6 integrin<sup>+</sup> and GFP<sup>+</sup> cells within the live (propidium iodide negative) gate were purified by FACS to isolate keratinocytes from 7 week old *K14*-H2BGFP mice. B) Purity of isolated fibroblasts and keratinocytes was determined by real time PCR for mRNA expression of *vimentin* and *keratin 14 (K14)* in isolated cells. C) Immunostaining with rabbit IgG and ER-TR7 shows specificity of staining for IL-22R.

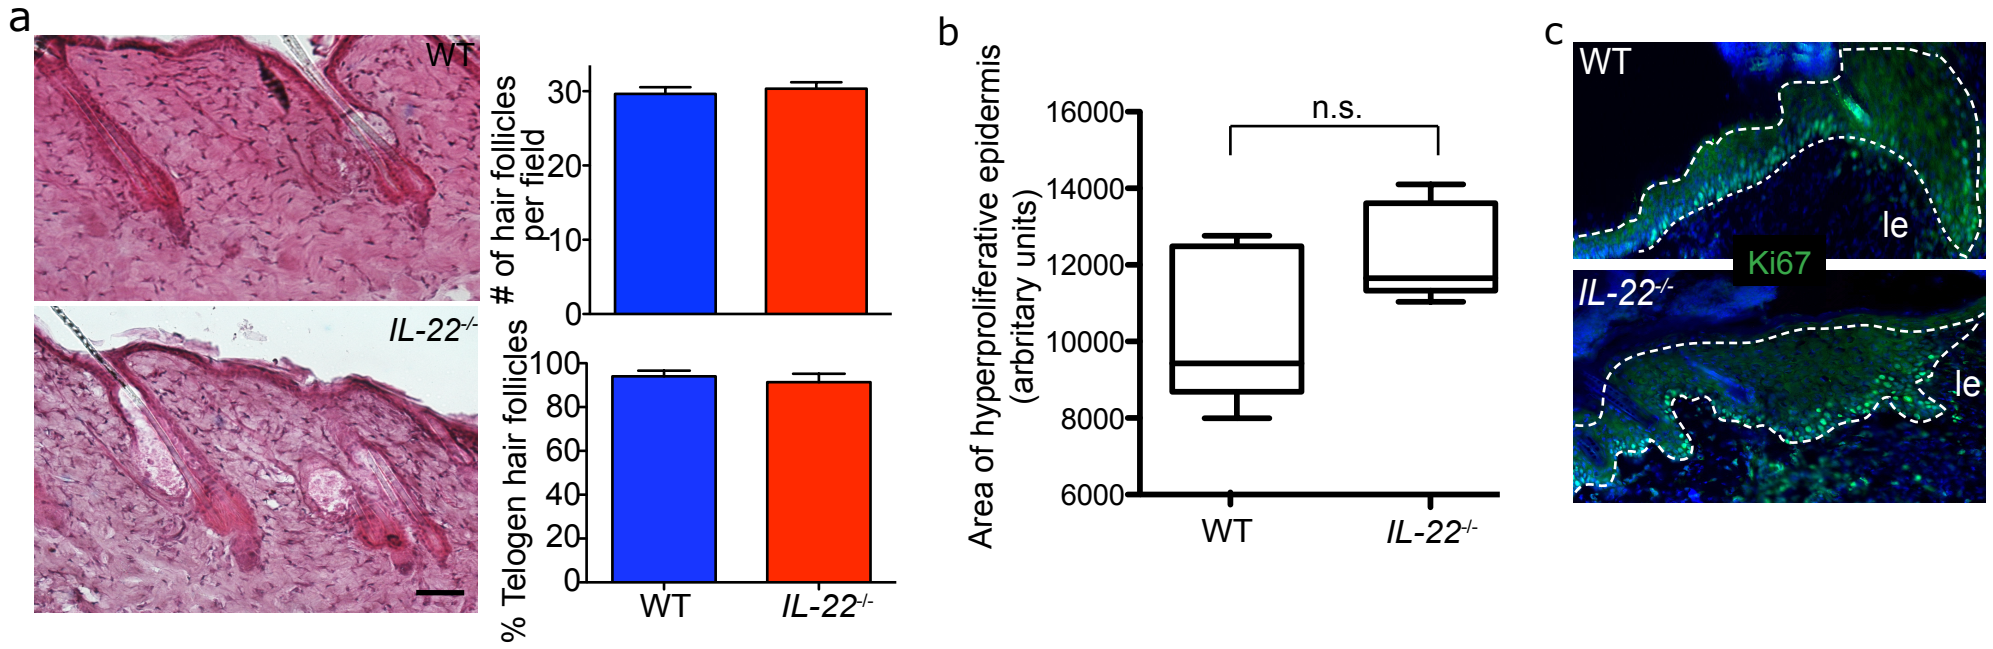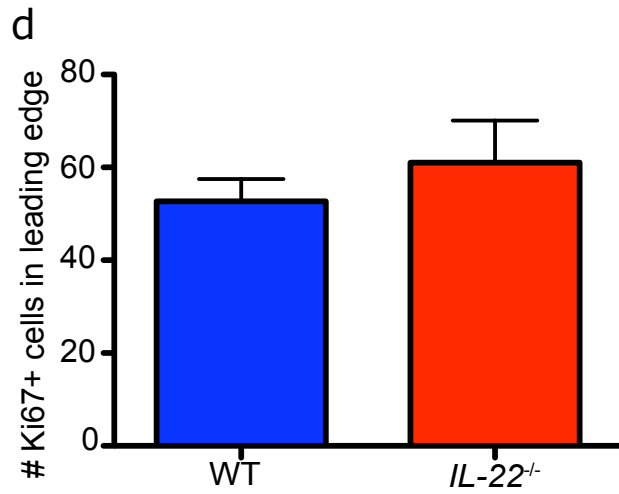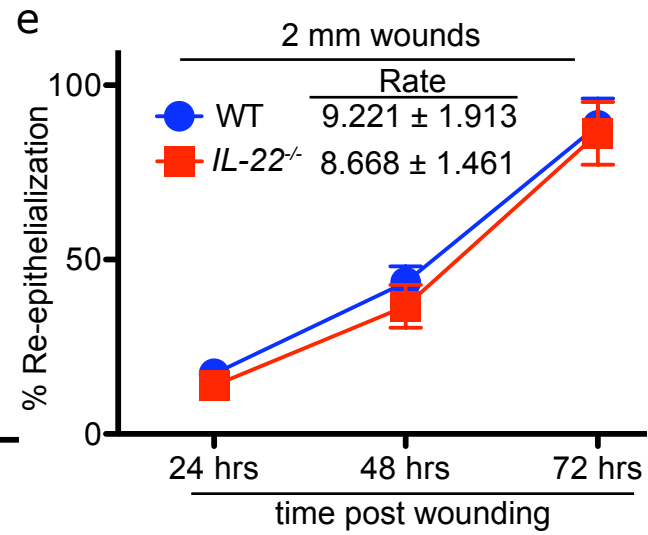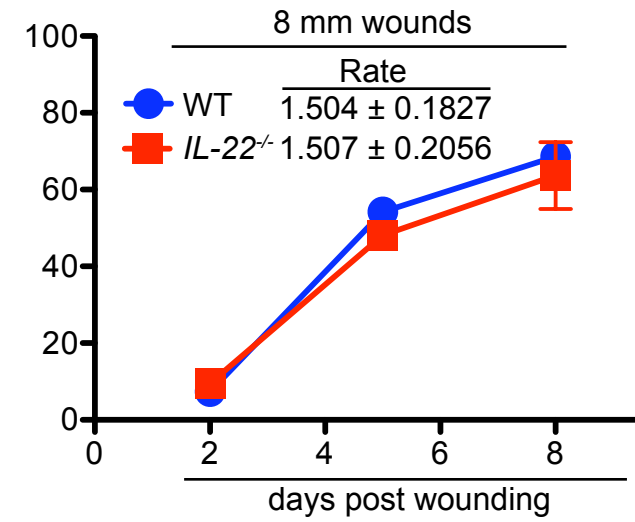

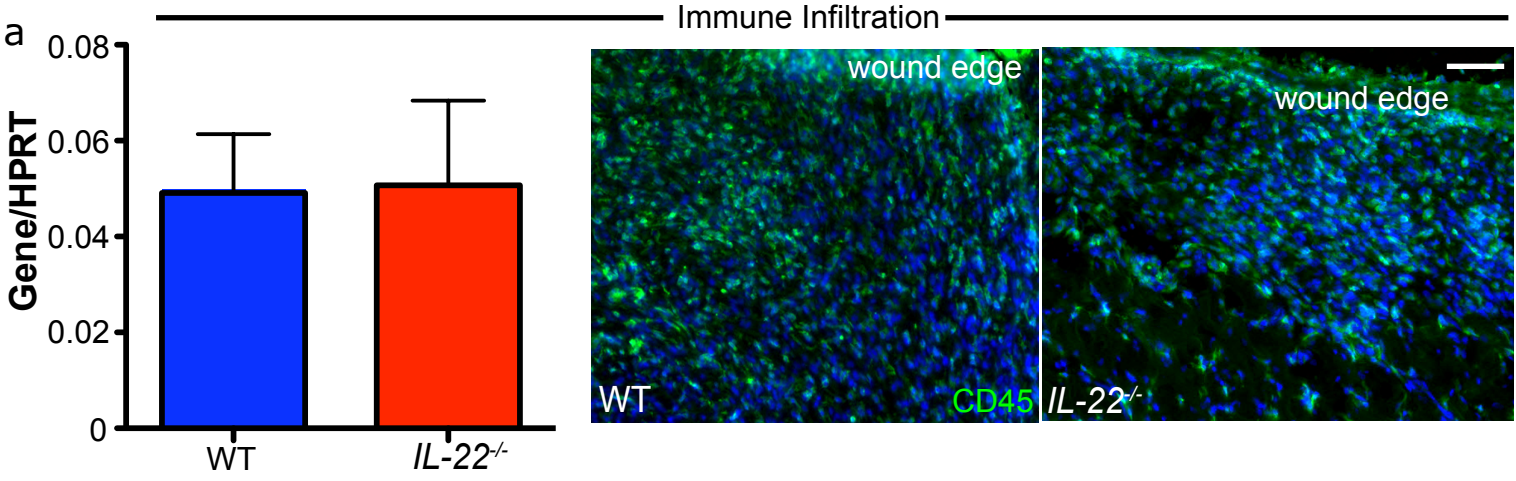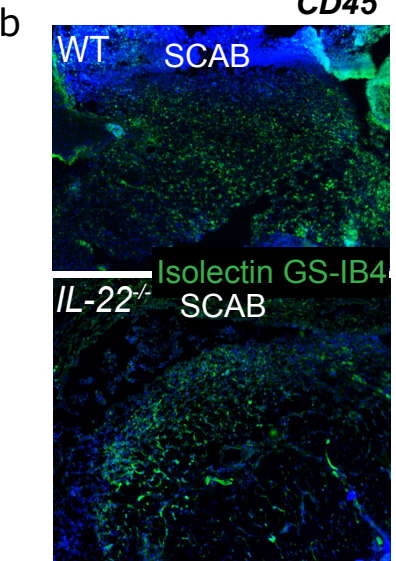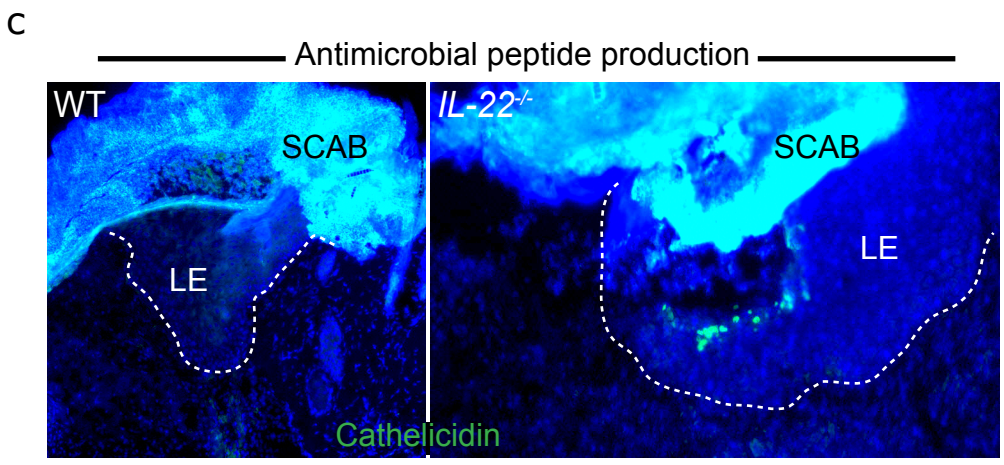

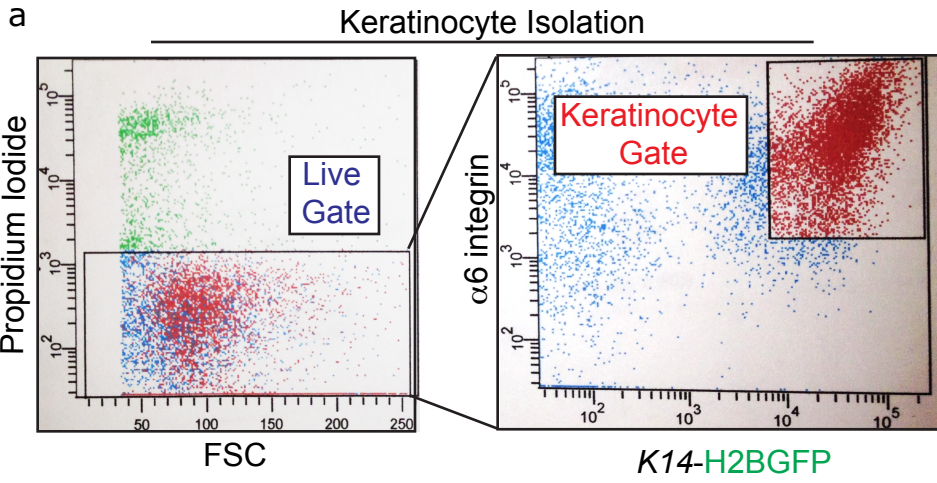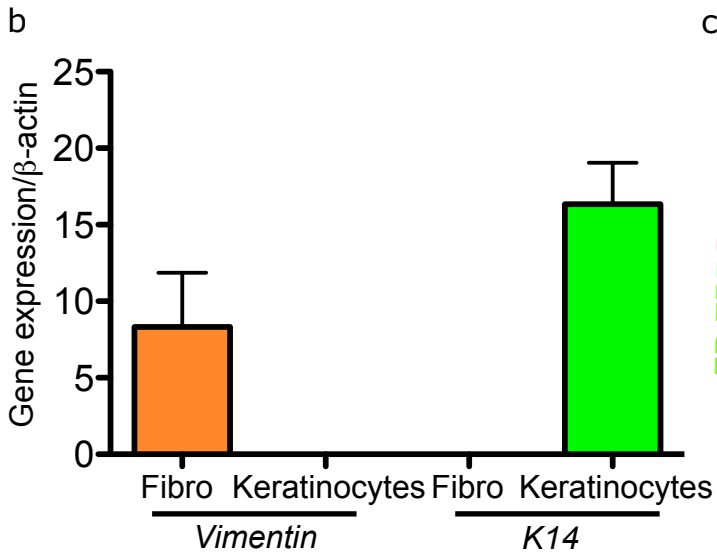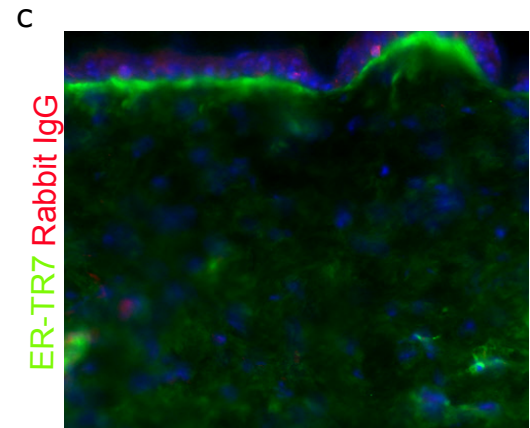

Supplement: NIHMS418908-supplement-supplement_1.pdf [file NIHMS418908-supplement-supplement_1.pdf]
